# Supplementary material for: Genome-wide alteration in DNA hydroxymethylation in the sperm from bisphenol A-exposed men
Source: PLoS One. 2017 Jun 5;12(6):e0178535. doi: 10.1371/journal.pone.0178535 (PMC5459435; doi:10.1371/journal.pone.0178535)
Supplement: S10 Table — (XLS) [file pone.0178535.s012.xls]

## Sheet: S10 Table
S10 Table. Pathway enrichment analysis of hyper-hMRs affected genes
Pathway	Hyper-hMR	Human	Total.hMR	Total.Human	Pvalue	FDR	Class
Glutamatergic synapse	27	80	1672	12209	1.15007e-06	0.000112324	Nervous System
Axon guidance	26	80	1672	12209	3.95484e-06	0.000289692	Development
Long-term depression	15	42	1672	12209	7.00395e-05	0.00410432	Nervous System
Arrhythmogenic right ventricular cardiomyopathy	19	65	1672	12209	0.000289046	0.00941006	Cardiovascular Diseases
Cholinergic synapse	23	84	1672	12209	0.000265696	0.00941006	Nervous System
Dopaminergic synapse	22	79	1672	12209	0.000261593	0.00941006	Nervous System
Calcium signaling pathway	32	129	1672	12209	0.000219091	0.00941006	Signal Transduction
